# Supplementary material for: Photoperiod and temperature as dominant environmental drivers triggering secondary growth resumption in Northern Hemisphere conifers
Source: PubMed Central journal article supplement (PMC7456155; doi:10.1073/pnas.2007058117), 2020-08-05
Supplement: pnas.2007058117.sapp01.pdf [file pnas.2007058117.sapp01.pdf]

## Supplementary Information for

### Photoperiod and temperature as dominant environmental drivers triggering secondary growth resumption in Northern Hemisphere conifers

Jian-Guo Huang<sup>a, b, 1, 2</sup>, Qianqian Ma<sup>a, b, 1</sup>, Sergio Rossi<sup>a, c</sup>, Franco Biondi<sup>d</sup>, Annie Deslauriers<sup>c</sup>, Patrick Fonti<sup>e</sup>, Eryuan Liang<sup>f</sup>, Harri Mäkinen<sup>g</sup>, Walter Oberhuber<sup>h</sup>, Cyrille B.K. Rathgeber<sup>i</sup>, Roberto Tognetti<sup>j</sup>, Václav Trembl<sup>k</sup>, Bao Yang<sup>l</sup>, Jiao-Lin Zhang<sup>m, b</sup>, Serena Antonucci<sup>j</sup>, Yves Bergeron<sup>n</sup>, J. Julio Camarero<sup>o</sup>, Filipe Campelo<sup>p</sup>, Katarina Čufar<sup>q</sup>, Henri E. Cuny<sup>r</sup>, Martin De Luis<sup>s</sup>, Alessio Giovannelli<sup>t</sup>, Jožica Gričar<sup>u</sup>, Andreas Gruber<sup>h</sup>, Vladimír Gryc<sup>v</sup>, Aylin Güney<sup>w, x</sup>, Xiali Guo<sup>a, b</sup>, Wei Huang<sup>y</sup>, Tuula Jyske<sup>g</sup>, Jakub Kašpar<sup>k</sup>, Gregory King<sup>e, z</sup>, Cornelia Krause<sup>c</sup>, Audrey Lemay<sup>c</sup>, Feng Liu<sup>aa, b</sup>, Fabio Lombardi<sup>bb</sup>, Edurne Martinez del Castillo<sup>s</sup>, Hubert Morin<sup>c</sup>, Cristina Nabais<sup>p</sup>, Pekka Nöjd<sup>g</sup>, Richard L. Peters<sup>e, cc</sup>, Peter Prislan<sup>q</sup>, Antonio Saracino<sup>dd</sup>, Irene Swidrak<sup>h</sup>, Hanuš Vavřík<sup>v</sup>, Joana Vieira<sup>p</sup>, Biyun Yu<sup>a, b</sup>, Shaokang Zhang<sup>a, b</sup>, Qiao Zeng<sup>ee</sup>, Yalin Zhang<sup>a</sup>, and Emanuele Ziaco<sup>d</sup>

Corresponding author: Jian-Guo Huang

Email: [huangjg@scbg.ac.cn](mailto:huangjg@scbg.ac.cn)

#### This PDF file includes:

Supplementary text

Methods S1 to S3

Texts S1 to S2

Figures S1 to S7

Tables S1 to S6

Dataset S1

References

Other supplementary materials:

Code S1

## Supplementary Information Text

### Methods S1 to S3

#### **S1:** *Chilling and forcing*

Trees in temperate and cold ecosystems usually enter the dormancy state in later autumn or early winter after growth cessation and bud set in late summer or early autumn. The dormancy state involves the “rest” period (also called endodormancy phase) and the “quiescence” period (also called ecodormancy phase) (1). During the rest period, trees requires to be exposed to low chilling temperatures for a longer period (days to months) to break “rest” state. At the time of rest completion, the “quiescence” period is attained. During quiescence, the buds attain full ontogenetic competence, which is the full ability to respond to high forcing temperatures by anatomic development towards bud burst or cambial cell division (2). The chilling requirement is thus normally defined as the length of the period (days or hours) during which temperature remains within a specific range (3). Compared to the most effective temperature range of 0~5 °C usually calculated starting from November 1<sup>st</sup> of the previous year to the onset day of spring phenology of primary meristems reported previously (3), we found the temperature range of -5~5 °C is most effective for wood formation onset during our trial modeling analyses (*SI Appendix Table S6*). We therefore summarized the days when daily temperature was within this range, starting from November 1<sup>st</sup> of the previous year to the onset day of wood formation. The forcing requirement is normally defined as the length of period (days or hours) during which temperature remains above a specific threshold. The temperature threshold above 5 °C for the period starting from January 1<sup>st</sup> to the onset day of spring primary phenology was considered to be most effective and commonly used to calculate spring forcing requirement (2). We thus followed this threshold and the same reference period mentioned above for calculation of forcing requirement for wood formation onset.

#### **S2:** *Trends fitted by generalized additive models (GAMs)*

Generalized additive models (GAMs) were used to examine the general trend in mean annual temperature (MAT) and photoperiod of sites against latitude. Linear regression was performed to quantify the relationship between the onset date of wood formation and the photoperiod of the sites.

GAMs were also applied to examine the changes in the onset date of wood formation in relation to MAT and the scPDSI drought index, as well as the changes in the onset date of wood formation in relation to photoperiod, chilling, and forcing.

### **S3: Preliminary analysis with linear mixed models (LMM)**

A linear mixed effects model (LMM), including species and site as random effects, was used to model the changes in the dates of onset of wood formation with photoperiod.

$$D_{ijk} = \alpha + \beta_1 P_{ijk} + a_i + b_j + \varepsilon_{ijk}$$

where  $D_{ijk}$  is the date of onset of wood formation of species  $i$  at site  $j$  in year  $k$ ;  $P_{ijk}$  represents the photoperiod corresponding to  $D_{ijk}$ ;  $\alpha$  is the intercept;  $\beta_1$  is the slope, and  $a_i$  and  $b_j$ , are, respectively, the random effects of the species  $i$  and site  $j$ ; and  $\varepsilon_{ijk}$  is the error term.

In addition, LMM was also used to model the changes in the dates of onset of wood formation with MAT instead of photoperiod.

$$D_{ijk} = \alpha + \beta_1 T_{ijk} + a_i + b_j + \varepsilon_{ijk}$$

where  $T_{ijk}$  represents the MAT corresponding to  $D_{ijk}$ , while the other parameters are the same as described above.

### **Texts S1 to S2**

#### **S1: General trend revealed by GAM**

The fitted generalized additive model (GAM) shows that the mean annual temperature (MAT) of the sites generally decreases toward higher latitudes (*SI Appendix, Fig. S3*), but the photoperiod of the sites increases toward higher latitudes (*SI Appendix, Fig. S5*). The

onset of wood formation was positively and linearly associated with photoperiod ( $R^2=0.68$ ,  $p<0.001$ ) (*SI Appendix, Fig. S5*).

The relationships between the onset of wood formation and MAT and scPDSI show a downward surface, where the onset of wood formation is negatively related with MAT but shows a flat variation in the scPDSI (*SI Appendix, Fig. S6*). The relationships between the onset of wood formation and photoperiod vs. forcing and chilling also presented an “L” shape. The “L” shape reflects less variability in days of the year (DOY; ca. 140–160) when photoperiod continues changing at high latitudes (*SI Appendix, Fig. S7*).

**S2: Photoperiod or MAT alone as a significant factor affecting wood formation onset**

Our LMM results show that the changes in the dates of wood formation onset in the Northern Hemisphere conifers can be modeled as a function of photoperiod alone, along with the random effects of site and species. The marginal  $R^2$  and conditional  $R^2$  are 0.46 and 0.98, respectively (*SI Appendix, Table S2*).

When photoperiod was replaced by the mean annual temperature (MAT), our LMM results show that the changes in dates of wood formation onset in the Northern Hemisphere conifers can be modeled as a function of MAT alone, along with the random effects of site and species. The marginal  $R^2$  and conditional  $R^2$  is 0.50 and 0.85, respectively (*SI Appendix, Table S2*).

**Figures S1-S7:**

**Fig. S1.** Location of the study sites across the Northern Hemisphere, according to altitude and biome type.

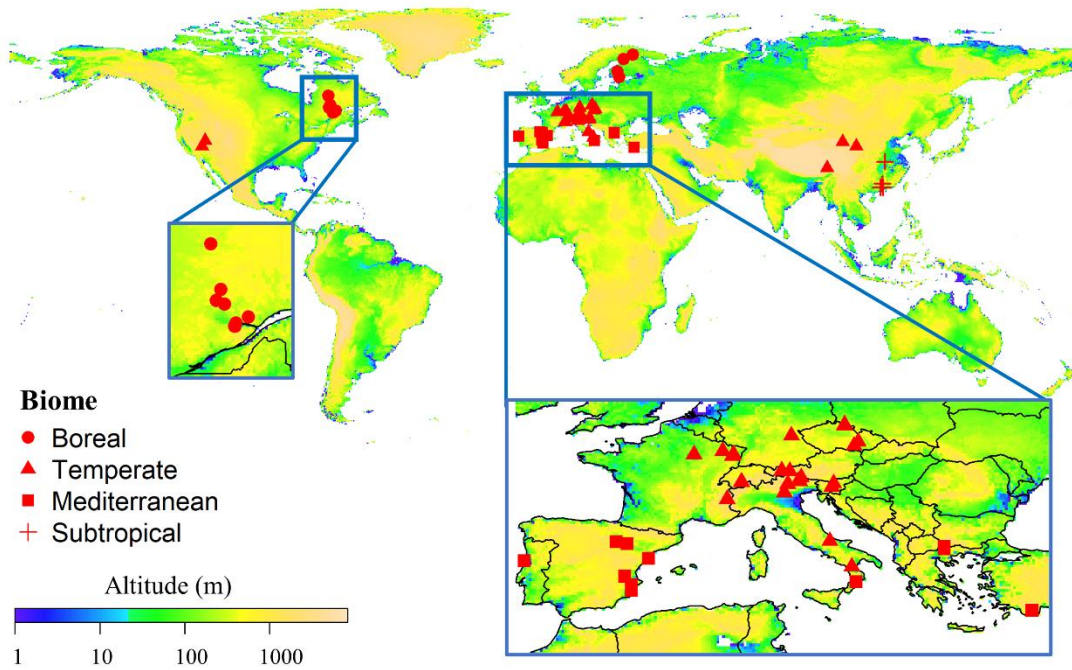

**Fig. S2.** Linear regression between photoperiod and the mean annual temperature (MAT) of the sites. The whole study area was divided into the subtropical (cross), temperate (triangles), Mediterranean (squares), and boreal (dots) biomes. The species were reported with the following acronyms and classified into early (JUPR, JUTH, LADE, PIFL, PIHA, PIHE, PILO, PIMA, PIPE, PIPI, PIPO, PISY, PITA, PIUN) and late (ABAL, ABBA, ABGE, CELI, PCAB, PCMA, PICE) successional species types. Points (n=2030) represent individual trees from the 79 study sites included in this study.

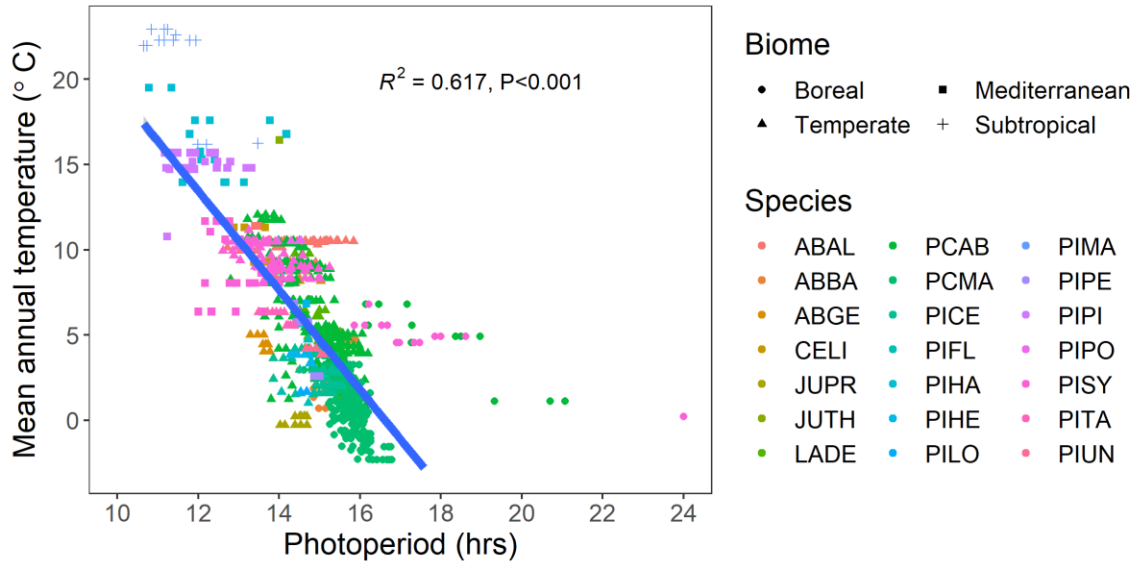

**Fig. S3.** Mean annual temperature (MAT) of the sites against latitudes (smoothed line resulted from generalized additive model GAM). The whole study area was divided into the subtropical (cross), temperate (triangles), Mediterranean (squares), and boreal (dots) biomes. The species were reported with the following acronyms and classified into early (JUPR, JUTH, LADE, PIFL, PIHA, PIHE, PILO, PIMA, PIPE, PIPI, PIPO, PISY, PITA, PIUN) and late (ABAL, ABBA, ABGE, CELI, PCAB, PCMA, PICE) successional species types. Points (n=2030) represent individual trees from the 79 study sites included in this study. EDF: estimated degree of freedom.

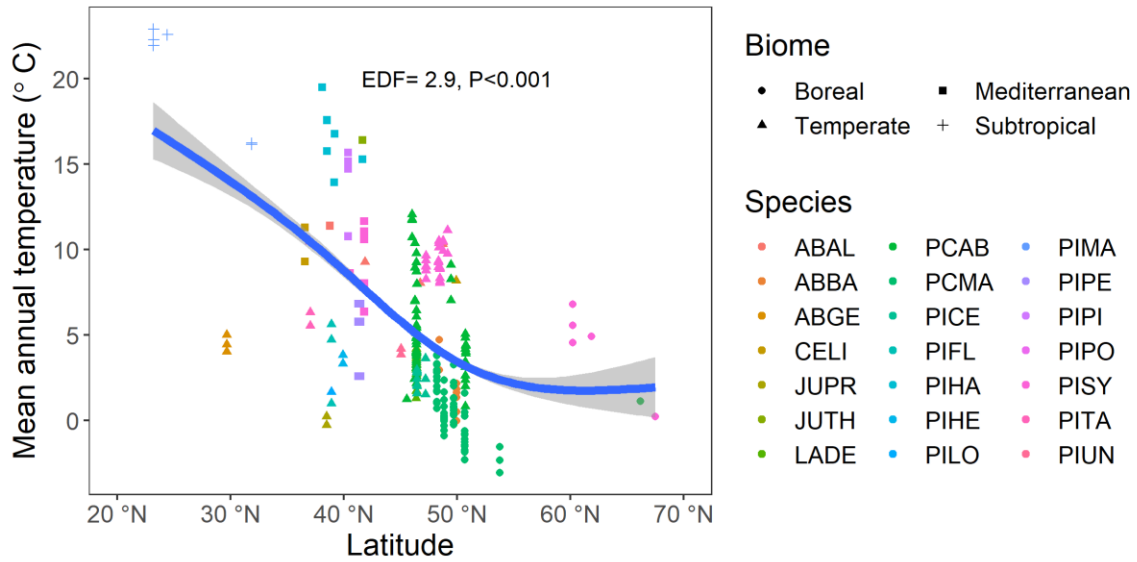



**Fig. S4.** Variation in the onset date of wood formation (DOY, day of the year) according to the mean annual temperature (MAT) of the sites (smoothed line resulted from generalized additive model GAM). The whole study area was divided into the subtropical (cross), temperate (triangles), Mediterranean (squares), and boreal (dots) biomes. The species were reported with the following acronyms and classified into early (JUPR, JUTH, LADE, PIFL, PIHA, PIHE, PILO, PIMA, PIPE, PIPI, PIPO, PISY, PITA, PIUN) and late (ABAL, ABBA, ABGE, CELI, PCAB, PCMA, PICE) successional species types. Points (n=2030) represent individual trees from the 79 study sites included in this study. EDF: estimated degree of freedom.

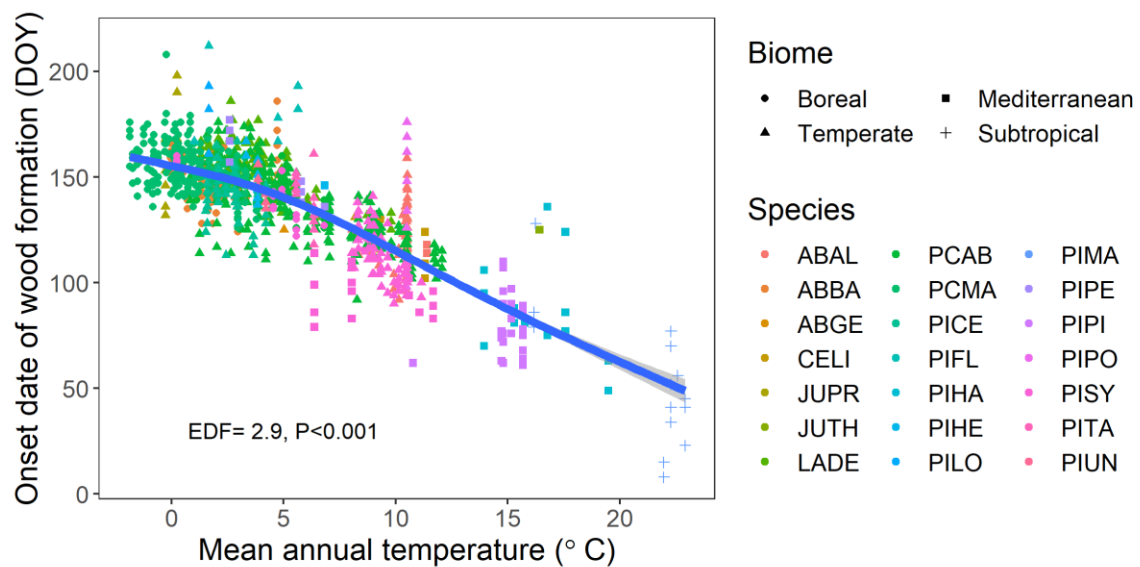

**Fig. S5.** Variation in the onset of wood formation (DOY, day of the year) according to the photoperiod of the sites (straight line fit from linear regression) (lower panel), and photoperiod varies with latitudes (upper panel). The whole study area was divided into the subtropical (cross), temperate (triangles), Mediterranean (squares), and boreal (dots) biomes. The species were reported with the following acronyms and classified into early (JUPR, JUTH, LADE, PIFL, PIHA, PIHE, PILO, PIMA, PIPE, PIPI, PIPO, PISY, PITA, PIUN) and late (ABAL, ABBA, ABGE, CELI, PCAB, PCMA, PICE) successional species types. Points (n=2030) represent individual trees from the 79 study sites included in this study. EDF: estimated degree of freedom.

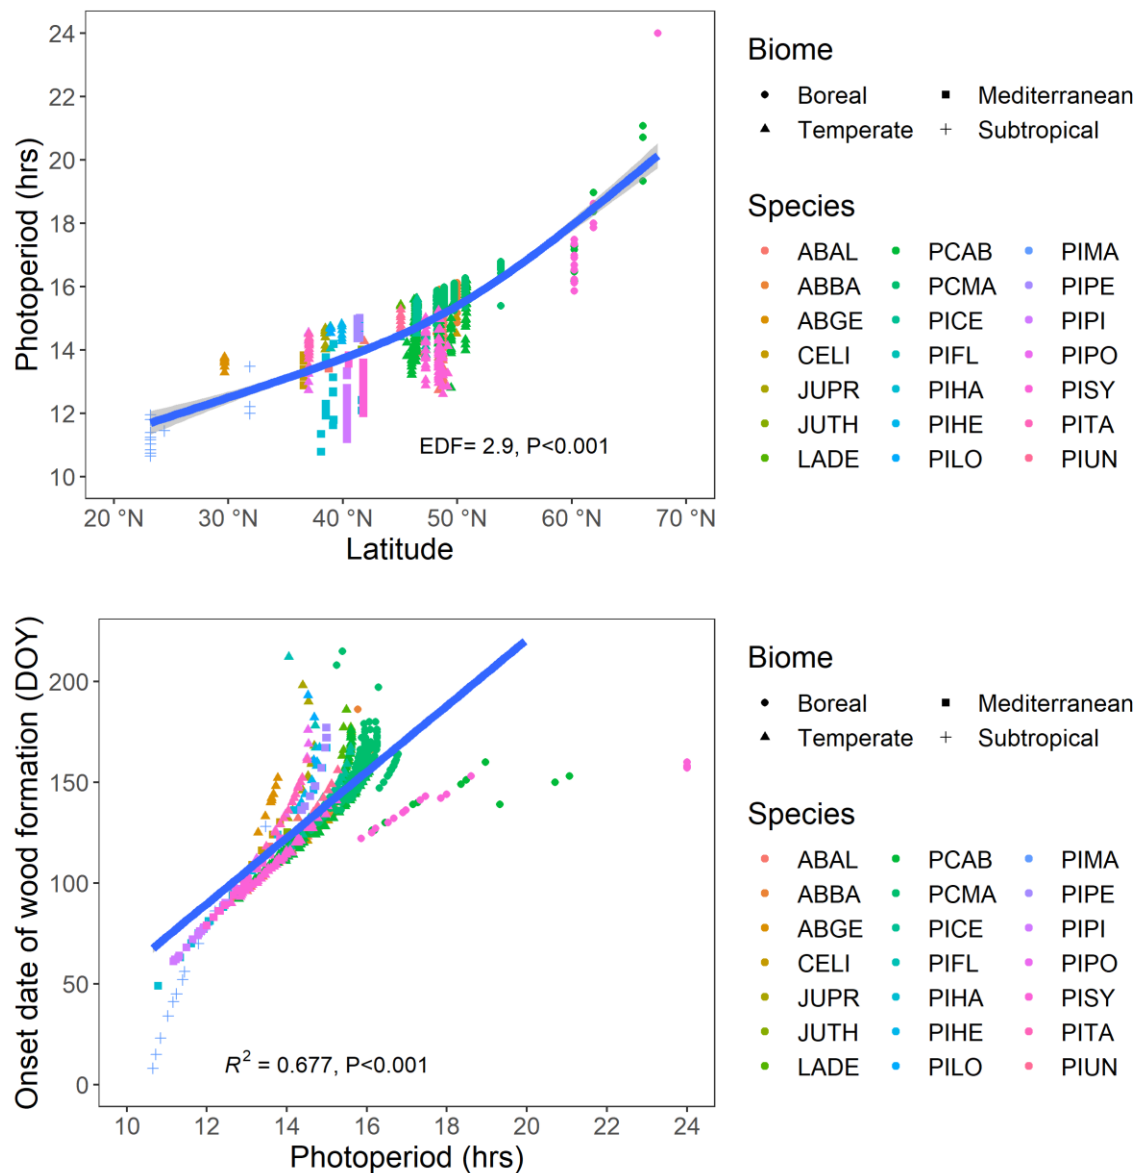

**Fig. S6.** Changes in the onset of wood formation (DOY, day of the year) in relation to MAT (mean annual temperature, abbreviated as “temperature” in the x-axis) and the scPDSI drought index (fitted by a generalized additive model).

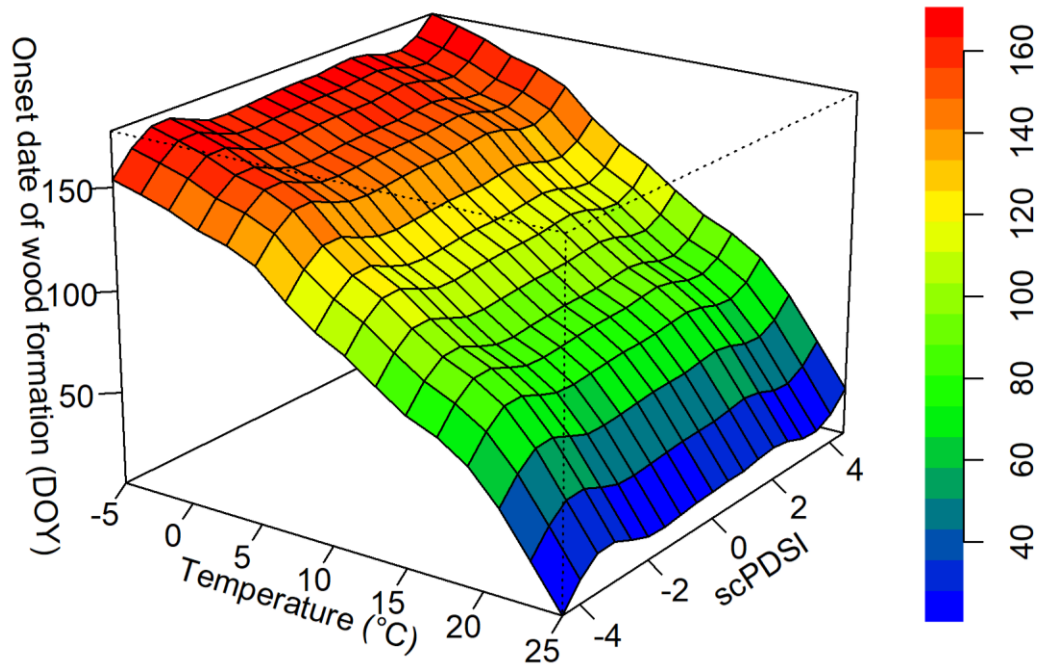

**Fig. S7.** Changes in the onset of wood formation (DOY, day of the year) in relation to photoperiod, chilling, and forcing (FU) days (fitted by a generalized additive model).

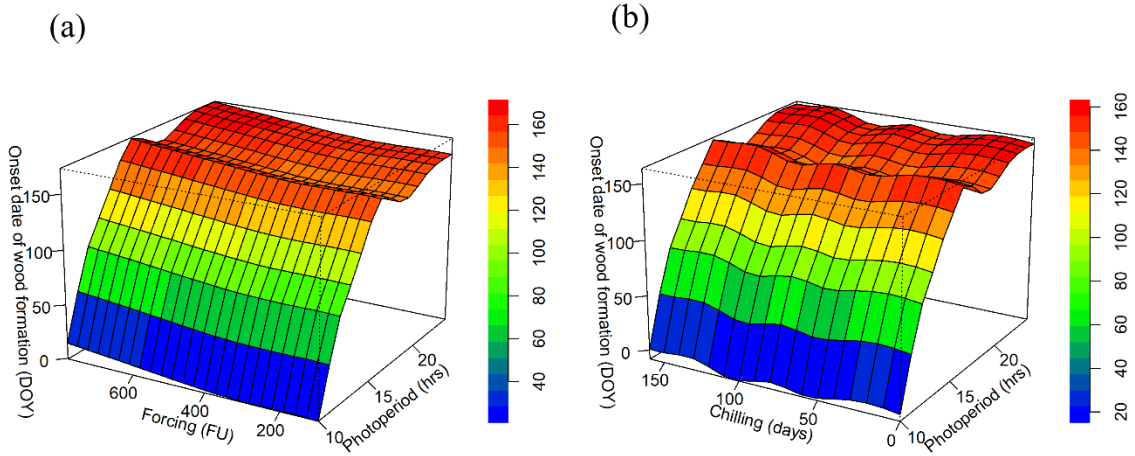

**Table S1.** Sites, species, and years included in the analysis. The species were reported with the following acronyms and classified into early (E) and late (L) successional species type: ABAL, *Abies alba*, L; ABBA, *Abies balsamea*, L; ABGE, *Abies georgei*, L; CELI, *Cedrus libani*, L; PCAB, *Picea abies*, L; PCMA, *Picea mariana*, L; PICE, *Pinus cembra*, L; JUPR, *Juniperus przewalskii*, E; JUTH, *Juniperus thurifera*, E; LADE, *Larix decidua*, E; PIFL, *Pinus flexilis*, E; PIHA, *Pinus halepensis*, E; PIHE, *Pinus heldreichii*, E; PILO, *Pinus longaeva*, E; PIMA, *Pinus massoniana*, E; PIPE, *Pinus peuce*, E; PIPI, *Pinus pinaster*, E; PIPO, *Pinus ponderosa*, E; PISY, *Pinus sylvestris*, E; PITA, *Pinus tabulaeformis*, E; PIUN, *Pinus uncinata*, E. The whole study area is divided into subtropical (S), temperate (T), Mediterranean (M), and boreal (B) biomes. Site temperature for each site is computed as the average of mean annual temperatures (MATs) across all years providing observations for the site. Sites with climate data obtained from nearby weather stations are indicated by \*.

| ID  | Site                         | Biome | Latitude | Longitude | Altitude   |  | Study years | Species    | Successional stage | Number of trees | Site temperature( °C) | References |
|-----|------------------------------|-------|----------|-----------|------------|--|-------------|------------|--------------------|-----------------|-----------------------|------------|
|     |                              |       |          |           | (m a.s.l.) |  |             |            |                    |                 |                       |            |
| DHS | CN-Dinghu Mountain           | S     | 23 °11'N | 112 °32'E | 256        |  | 2015        | PIMA       | E                  | 4               | 22.9                  | 4          |
| ZWY | CN-SCBG                      | S     | 23 °11'N | 113 °22'E | 23         |  | 2015-2016   | PIMA       | E                  | 5               | 22.2                  |            |
| SMT | CN-Shimentai                 | S     | 24 °24'N | 113 °12'E | 261        |  | 2015        | PIMA       | E                  | 4               | 22.6                  |            |
| SYG | CN-Sygera Mountain           | T     | 29 °39'N | 94 °42'E  | 3850       |  | 2007-2009   | ABGE       | L                  | 5               | 4.5                   | 5          |
| JGS | CN-Jigong Mountain           | S     | 31 °51'N | 114 °5'E  | 811        |  | 2014-2015   | PIMA       | E                  | 3               | 16.2                  | 6          |
| T2  | TU-Cedar Research Forest     | M     | 36 °34'N | 29 °57'W  | 1960       |  | 2013        | CELI       | L                  | 3               | 9.3                   | 7          |
| T4  | TU-Cedar Research Forest     | M     | 36 °34'N | 29 °57'W  | 1055       |  | 2013        | CELI       | L                  | 3               | 11.3                  | 7          |
| T1  | TU-Cedar Research Forest     | M     | 36 °34'N | 29 °57'W  | 1665       |  | 2013        | CELI       | L                  | 3               | 9.3                   | 7          |
| T3  | TU-Cedar Research Forest     | M     | 36 °34'N | 29 °57'W  | 1355       |  | 2013        | CELI       | L                  | 3               | 11.3                  | 7          |
| SHM | US-Sheep Range Montane       | T     | 36 °59'N | 115 °21'W | 2320       |  | 2015-2016   | PIPO       | E                  | 12              | 10.6                  | 8          |
| HSM | CN-Hasi Mountains            | T     | 37 °02'N | 104 °28'E | 2456       |  | 2013-2014   | PITA       | E                  | 9               | 5.9                   | 9          |
| GUA | ES-Guardamar del Segura      | M     | 38 °06'N | 0 °39'W   | 15         |  | 2005        | PIHA       | E                  | 6               | 19.5                  | 10         |
| SDL | CN-Sidalong Forestry Station | T     | 38 °27'N | 99 °56'E  | 3550       |  | 2013-2014   | JUPR       | E                  | 9               | -0.6                  | 9          |
| MAI | ES-Maimó                     | M     | 38 °31'N | 0 °38'W   | 845        |  | 2004-2005   | PIHA       | E                  | 10              | 16.9                  | 11         |
| SER | IT-Serra San Bruno           | M     | 38 °46'N | 16 °31'E  | 1008       |  | 2015        | ABAL       | L                  | 5               | 11.4                  | 12         |
| SSM | US-Snake Range Montane       | T     | 38 °53'N | 114 °20'W | 2810       |  | 2013-2014   | PIFL       | E                  | 5               | 5.0                   | 13         |
| SSW | US-Snake Range Subalpine     | T     | 38 °54'N | 114 °18'W | 3355       |  | 2013-2014   | PIFL, PILO | E                  | 10              | 1.6                   | 13,14      |
| JAR | ES                           | M     | 39 °15'N | 1 °15'W   | 571        |  | 2005        | PIHA       | E                  | 6               | 14.0                  | 11         |
| JAN | ES                           | M     | 39 °19'N | 1 °15'W   | 850        |  | 2004        | PIHA       | E                  | 2               | 16.8                  | 11         |
| POL | IT-Pollino                   | T     | 39 °54'N | 16 °12'E  | 2053       |  | 2003-2004   | PIHE       | E                  | 10              | 3.6                   | 15         |

| ID   | Site                         | Biome | Latitude    | Longitude  | Altitude   |  | Study years | Species          | Successional stage | Number of trees | Site temperature( °C) | References |
|------|------------------------------|-------|-------------|------------|------------|--|-------------|------------------|--------------------|-----------------|-----------------------|------------|
|      |                              |       |             |            | (m a.s.l.) |  |             |                  |                    |                 |                       |            |
| TCH  | PT                           | M     | 40 °22'N    | 8 °49'W    | 15         |  | 2010-2014   | PIPI             | E                  | 22              | 14.7                  | 16         |
| VIL  | ES-Villarroya de los Pinares | M     | 40 °31'N    | 0 °39'E    | 1690       |  | 2005        | PISY             | E                  | 5               | 8.6                   | 17         |
| TDR  | BG-Bunderitsa valley         | M     | 41 °26'N    | 23 °25'E   | 1780       |  | 2012-2014   | PIHE, PIPE       | E                  | 10              | 5.5                   | 11         |
| VRN  | BG-Bunderitsa valley         | M     | 41 °27'N    | 23 °15'E   | 1850       |  | 2012-2014   | PIHE, PIPE       | E                  | 10              | 5.3                   | 11         |
| PEN  | ES-Peñaflor                  | M     | 41 °47'N    | 0 °58'W    | 340        |  | 2006-2010   | JUTH, PIHA       | E                  | 27              | 15.7                  | 18         |
| MYH  | ES-Moncayo                   | M     | 41 °47'N    | 0 °43'W    | 1600       |  | 2011-2013   | PISY             | E                  | 6               | 8.3                   | 11         |
| MYL* | ES                           | M     | 41 °47'N    | 1 °49'W    | 1600       |  | 2011-2012   | PISY             | E                  | 6               | 11.4                  | 11         |
| PES  | IT-Pescopennataro            | T     | 41 °52'N    | 14 °30'E   | 1380       |  | 2015        | ABAL             | L                  | 5               | 9.2                   | 12         |
| SUS  | IT-Val di Susa               | T     | 45 °3'N     | 6 °40'E    | 2030       |  | 2003-2004   | LADE, PICE, PIUN | E, L, E            | 15              | 4.0                   | 19         |
| SAV* | IT-Lavazè                    | T     | 45 °34'N    | 11 °02'E   | 667        |  | 2010        | PCAB             | L                  | 3               | 11                    | 20         |
| PAN  | SI-Panska reka               | T     | 46 °0'N     | 14 °40'E   | 400        |  | 2009-2012   | PCAB             | L                  | 12              | 11.6                  | 21         |
| LAV  | IT-Lavaze                    | T     | 46 °13'N    | 11 °18'E   | 1776       |  | 2010        | PCAB             | L                  | 3               | 2.4                   | 10         |
| MEN  | SI-Menina Planina            | T     | 46 °16'N    | 14 °48'E   | 1200       |  | 2009-2012   | PCAB             | L                  | 13              | 7.2                   | 21         |
| N22  | CH-Läschtental-N22           | T     | 46 °22'52"N | 7 °46'22"E | 2182       |  | 2007-2010   | LADE             | E                  | 4               | 2.2                   | 11, 22     |
| N08  | CH-Läschtental-N08           | T     | 46 °18'9"N  | 7 °44'27"E | 804        |  | 2008-2010   | LADE, PCAB       | E, L               | 8               | 9.3                   | 11, 22     |
| N13d | CH-Läschtental-N13d          | T     | 46 °23'30"N | 7 °45'40"E | 1361       |  | 2007-2013   | LADE, PCAB       | E, L               | 8               | 5.5                   | 11, 22     |
| N13w | CH-Läschtental-N13w          | T     | 46 °23'36"N | 7 °45'50"E | 1321       |  | 2013        | LADE, PCAB       | E, L               | 6               | 4.0                   | 11, 22     |
| N16  | CH-Läschtental-N16           | T     | 46 °23'14"N | 7 °45'52"E | 1634       |  | 2007-2010   | LADE, PCAB       | E, L               | 8               | 4.9                   | 11, 22     |
| N19  | CH-Läschtental-N19           | T     | 46 °23'13"N | 7 °46'26"E | 1961       |  | 2007-2010   | LADE, PCAB       | E, L               | 8               | 3.1                   | 11, 22     |
| S16  | CH-Läschtental-S16           | T     | 46 °23'50"N | 7 °45'19"E | 1670       |  | 2007-2013   | LADE, PCAB       | E, L               | 8               | 4.8                   | 11, 22     |
| S19  | CH-Läschtental-S19           | T     | 46 °23'48"N | 7 °44'45"E | 1928       |  | 2007-2013   | LADE, PCAB       | E, L               | 8               | 3.7                   | 11, 22     |

| ID   | Site                        | Biome | Latitude   | Longitude | Altitude   |  | Study years | Species          | Successional stage | Number of trees | Site temperature( °C) | References |
|------|-----------------------------|-------|------------|-----------|------------|--|-------------|------------------|--------------------|-----------------|-----------------------|------------|
|      |                             |       |            |           | (m a.s.l.) |  |             |                  |                    |                 |                       |            |
| S22  | CH-Löschtal-S22             | T     | 46°23'59"N | 7°44'33"E | 2104       |  | 2007-2013   | LADE             | E                  | 4               | 3.1                   | 11,22      |
| SVT  | IT-San Vito di Cadore       | T     | 46°26'N    | 12°13'E   | 1000       |  | 2003        | PCAB             | L                  | 1               | 8.0                   | 23         |
| 5T1  | IT-Cinque Torri 1           | T     | 46°27'N    | 12°8'E    | 2085       |  | 2001-2005   | LADE, PCAB, PICE | E, L, L            | 23              | 2.4                   | 24         |
| 5T3  | IT-Cinque Torri 3           | T     | 46°27'N    | 12°8'E    | 2085       |  | 2004-2005   | LADE, PCAB, PICE | E, L, L            | 15              | 1.8                   | 25         |
| 5T2  | IT-Cinque Torri 2           | T     | 46°28'N    | 12°8'E    | 2156       |  | 2002-2005   | LADE, PCAB, PICE | E, L, L            | 12              | 2.3                   | 24         |
| BOR  | IT-Borca di Cadore          | T     | 46°44'N    | 12°19'E   | 1150       |  | 2015        | ABAL             | L                  | 5               | 8.1                   | 12         |
| TIM  | AT-Patscherkofel-timberline | T     | 47°12'N    | 11°27'E   | 1950       |  | 2007        | PICE             | L                  | 6               | 3.7                   | 26         |
| TRE  | AT-Patscherkofel-treeline   | T     | 47°12'N    | 11°27'E   | 2110       |  | 2007        | PICE             | L                  | 4               | 2.4                   | 26         |
| KRU  | AT-Patscherkofel-krummholz  | T     | 47°12'N    | 11°27'E   | 2180       |  | 2007        | PICE             | L                  | 5               | 1.5                   | 26         |
| DRY  | AT-Tschirgant dry-mesic     | T     | 47°14'N    | 10°50'E   | 750        |  | 2010-2011   | LADE, PCAB, PISY | E, L, E            | 29              | 9.0                   | 27         |
| SIM2 | CA-Simoncouche2             | B     | 48°12'N    | 71°14'W   | 350        |  | 2010-2011   | ABBA, PCMA       | L                  | 12              | 2.6                   | 28         |
| SIM  | CA-Simoncouche              | B     | 48°13'N    | 71°15'W   | 338        |  | 2005-2014   | ABBA, PCMA       | L                  | 55              | 2.4                   | 29         |
| ABR  | FR-Abreschviller            | T     | 48°21'N    | 7°4'E     | 430        |  | 2007-2009   | ABAL, PCAB, PISY | L, L, E            | 16              | 9.2                   | 31         |
| WAL  | FR-Walscheid                | T     | 48°22'N    | 7°5'E     | 370        |  | 2007-2009   | ABAL, PCAB, PISY | L, L, E            | 16              | 10.3                  | 31         |
| ARV  | CA-Arvida                   | B     | 48°26'N    | 71°9'W    | 80         |  | 1999-2000   | ABBA             | L                  | 18              | 3.7                   | 19         |
| GRA  | FR-Grandfontaine            | T     | 48°28'N    | 4°08'E    | 650        |  | 2007-2008   | ABAL, PCAB, PISY | L, L, E            | 15              | 8.2                   | 31         |
| GRD  | FR-Grandfontaine            | T     | 48°29'N    | 7°9'E     | 643        |  | 2007-2009   | ABAL, PCAB, PISY | L, L, E            | 15              | 8.6                   | 31         |
| AMA  | FR-Amance forest            | T     | 48°44'52"N | 6°19'30"E | 270        |  | 2006-2007   | ABAL             | L                  | 20              | 10.5                  | 32         |
| AMA* | FR-Amance forest            | T     | 48°44'52"N | 6°19'30"E | 270        |  | 2006-2007   | PISY             | E                  | 25              | 10.4                  | 33         |
| BER  | CA-Bernatchez               | B     | 48°51'N    | 70°20'W   | 611        |  | 2002-2014   | PCMA             | L                  | 31              | 0.5                   | 29         |
| SOB* | CZ-Brno                     | T     | 49°09'N    | 16°22'W   | 404        |  | 2013-2014   | PISY             | E                  | 6               | 10.5                  | 34         |



| ID   | Site                     | Biome | Latitude | Altitude  |            | Study years | Species    | Successional stage | Number of trees | Site temperature( °C) | References |
|------|--------------------------|-------|----------|-----------|------------|-------------|------------|--------------------|-----------------|-----------------------|------------|
|      |                          |       |          | Longitude | (m a.s.l.) |             |            |                    |                 |                       |            |
| RAJ  | CZ-Drahany highland      | T     | 49 °26'N | 16 °41'W  | 620        | 2009-2011   | PCAB       | L                  | 6               | 8.1                   | 21         |
| MIS  | CA-Mistassibi            | B     | 49 °43'N | 71 °56'W  | 342        | 2002-2014   | PCMA       | L                  | 28              | 1.1                   | 29         |
| O1   | DE-Bayreuth              | T     | 49 °55'N | 11 °35'W  | 355        | 2013        | CELI       | L                  | 3               | 8.2                   | 7          |
| L23  | CA-Liberal 23            | B     | 49 °58'N | 72 °30'W  | 380        | 1998-2000   | ABBA       | L                  | 10              | 1.5                   | 35         |
| L24  | CA-Liberal 24            | B     | 49 °58'N | 72 °30'W  | 430        | 1998-2001   | ABBA       | L                  | 20              | 1.0                   | 35         |
| DAN  | CA-Camp Daniel           | B     | 50 °41'N | 72 °11'W  | 487        | 2002-2014   | PCMA       | L                  | 25              | -0.7                  | 29         |
| LH1  | CZ-Lucn íHora-timberline | T     | 50 °43'N | 15 °40'E  | 1310       | 2010-2012   | PCAB       | L                  | 10              | 3.4                   | 36         |
| LH2  | CZ-Lucn íHora-treeline   | T     | 50 °43'N | 15 °41'E  | 1450       | 2010-2012   | PCAB       | L                  | 10              | 1.8                   | 36         |
| BLS  | CZ-B íLabe Valley north  | T     | 50 °44'N | 15 °39'E  | 1270       | 2013-2014   | PCAB       | L                  | 8               | 3.9                   | 11,22      |
| BLJ  | CZ-B íLabe Valley south  | T     | 50 °44'N | 15 °39'E  | 1270       | 2013-2014   | PCAB       | L                  | 8               | 4.2                   | 11, 22     |
| SISE | CZ-Maly Sisak east       | T     | 50 °45'N | 15 °39'E  | 1375       | 2014-2015   | PCAB       | L                  | 8               | 4.2                   | 37         |
| SISW | CZ-Maly Sisak west       | T     | 50 °46'N | 15 °38'E  | 1360       | 2014-2015   | PCAB       | L                  | 8               | 4.1                   | 37         |
| MIR  | CA-Mirage                | B     | 53 °47'N | 72 °52'W  | 384        | 2012-2014   | PCMA       | L                  | 10              | -2.3                  | 38         |
| RUO* | FI-Ruotsinkyl ä          | B     | 60 °12'N | 25 °0'E   | 60         | 2008-2010   | PCAB, PISY | L, E               | 15              | 5.6                   | 39         |
| HYY* | FI-Hyyti älä             | B     | 61 °53'N | 24 °18'E  | 181        | 2008        | PCAB, PISY | L, E               | 6               | 4.9                   | 40         |
| KIV* | FI-Kivalo                | B     | 66 °12'N | 26 °23'E  | 140        | 2009        | PCAB       | L                  | 5               | 1.1                   | 40         |
| VAR* | FI-V äri ö               | B     | 67 °30'N | 29 °23'E  | 390        | 2009        | PISY       | E                  | 4               | 0.2                   | 40         |

**Table S2.** Statistics of Models: DOY ~ Photoperiod, and DOY ~ MAT, where photoperiod and MAT were fixed effects in the two models. Values in brackets represent the total number of records. Note: For fixed effects, standard error (SE) is given in brackets; P<0.001 (\*\*\*) ; P<0.01(\*\*) ; P<0.05 (\*) ; Marginal R<sup>2</sup> (fixed effects only), Conditional R<sup>2</sup> (both fixed and random effects); AIC (Akaike information criterion); BIC (Bayesian information criterion); DOY: day of the year; MAT: mean annual temperature.

|                            | Photoperiod      | MAT             | Variance explained |
|----------------------------|------------------|-----------------|--------------------|
| Fixed effects              |                  |                 |                    |
| Intercept                  | -218.91(5.65)*** | 160.10(3.49)*** |                    |
| Photoperiod                | 23.85(0.31)***   |                 | 46%                |
| MAT                        |                  | -4.09(0.23)***  | 50%                |
| Random effects             |                  |                 |                    |
| SD(site)                   | 30.47            | 9.68            |                    |
| SD(species)                | 1.57             | 12.24           |                    |
| SD(residual)               | 5.25             | 10.06           |                    |
| Model fit                  |                  |                 |                    |
| Marginal R <sup>2</sup>    | 0.46             | 0.50            |                    |
| Conditional R <sup>2</sup> | 0.98             | 0.85            |                    |
| AIC                        | 13001            | 15408           |                    |
| BIC                        | 13029            | 15436           |                    |

**Table S3:** Statistics of Model: DOY ~ MAT + Forcing + Chilling + Prep. Note: For fixed effects, standard error (SE) is given in brackets; P<0.001 (\*\*\*); P<0.01(\*\*); P<0.05 (\*); Marginal R<sup>2</sup> (fixed effects only), Conditional R<sup>2</sup> (both fixed and random effects); AIC (Akaike information criterion); BIC (Bayesian information criterion); DOY: day of the year, the onset date of wood formation; MAT: mean annual temperature; Prep: precipitation; Number of observation =1480, which is lower than other models without the variable of precipitation due to missing values in precipitation data. Variance explained for the model with precipitation from January 1<sup>st</sup> to DOY was listed below.

| <b>Temperature + Forcing + Chilling+ Prep</b> |                               |                                     |                       |
|-----------------------------------------------|-------------------------------|-------------------------------------|-----------------------|
|                                               | Annual total<br>precipitation | Precipitation<br>(January 1 to DOY) | Variance<br>explained |
| <b>Fixed effects</b>                          |                               |                                     |                       |
| Intercept                                     | 121.4(2.35)***                | 115.7(2.09)***                      |                       |
| Temperature                                   | -5.97(0.16)***                | -5.65(0.16)***                      | 46.6%                 |
| Forcing                                       | 0.11(0.002)***                | 0.11(0.002)***                      | 31.2%                 |
| Chilling                                      | 0.29(0.01)***                 | 0.27(0.01)***                       | 4.5%                  |
| Prep.                                         | -0.0008(0.001)                | 0.02(0.002)*                        | 0.0%                  |
| <b>Random effects</b>                         |                               |                                     | 17.6%                 |
| SD(site)                                      | 9.31                          | 9.81                                |                       |
| SD(species)                                   | 2.33                          | 1.56                                |                       |
| SD(residual)                                  | 5.50                          | 5.39                                |                       |
| <b>Model fit</b>                              |                               |                                     |                       |
| Marginal R <sup>2</sup>                       | 0.84                          | 0.82                                |                       |
| Conditional R <sup>2</sup>                    | 0.96                          | 0.96                                |                       |
| AIC                                           | 9544                          | 9480                                |                       |
| BIC                                           | 9586                          | 9523                                |                       |

**Table S4:** Comparison among different models based on different SPEI temporal scales. Statistics of Model:  $DOY \sim MAT + Forcing + Chilling + SPEI$ . Note: For fixed effects, standard error (SE) is given in brackets;  $P < 0.001$  (\*\*\*) ;  $P < 0.01$  (\*\*);  $P < 0.05$  (\*); Marginal  $R^2$  (fixed effects only), Conditional  $R^2$  (both fixed and random effects); AIC (Akaike information criterion); BIC (Bayesian information criterion); DOY: day of the year; MAT: mean annual temperature. SPEI: Standard Precipitation-Evapotranspiration Index.

| <b>Temperature + Forcing + Chilling+SPEI</b> |                |                |                |
|----------------------------------------------|----------------|----------------|----------------|
|                                              | 1-month SPEI   | 3-month SPEI   | 6-month SPEI   |
| <b>Fixed effects</b>                         |                |                |                |
| Intercept                                    | 127.0(1.70)*** | 125.7(1.63)*** | 125.9(1.67)*** |
| Temperature                                  | -6.08(0.13)*** | -5.87(0.13)*** | -5.97(0.13)*** |
| Forcing                                      | 0.12(0.002)*** | 0.11(0.002)*** | 0.12(0.002)*** |
| Chilling                                     | 0.22(0.01)***  | 0.22(0.01)***  | 0.22(0.01)***  |
| SPEI                                         | 1.47(0.12)***  | 2.17(0.13)***  | 2.44(0.16)***  |
| <b>Random effects</b>                        |                |                |                |
| SD(site)                                     | 7.47           | 7.69           | 7.59           |
| SD(species)                                  | 2.42           | 1.91           | 2.31           |
| SD(residual)                                 | 5.85           | 5.68           | 5.72           |
| <b>Model fit</b>                             |                |                |                |
| Marginal $R^2$                               | 0.84           | 0.83           | 0.84           |
| Conditional $R^2$                            | 0.94           | 0.94           | 0.94           |
| AIC                                          | 13151          | 13041          | 13067          |
| BIC                                          | 13195          | 13086          | 13112          |

**Table S5:** Model results of Mediterranean biome. Statistics of Model 2: DOY ~ MAT + Forcing + Chilling + scPDSI. Note: For fixed effects, standard error (SE) is given in brackets; P<0.001 (\*\*\*) ; P<0.01(\*\*); P<0.05 (\*); Marginal R<sup>2</sup> (fixed effects only), Conditional R<sup>2</sup> (both fixed and random effects); AIC (Akaike information criterion); BIC (Bayesian information criterion); DOY: day of the year; MAT: mean annual temperature. scPDSI: the self-calibrating Palmer Drought Severity Index.

|                            | <b>Model 2: MAT +<br/>Forcing +<br/>Chilling+scPDSI</b> | P value | Variance<br>explained |
|----------------------------|---------------------------------------------------------|---------|-----------------------|
| Fixed effects              |                                                         |         |                       |
| Intercept                  | 122.3 (7.32)***                                         | <0.0001 |                       |
| MAT                        | -4.8 (0.34)***                                          | <2e-16  | 17.08%                |
| Forcing                    | 0.12(0.01)***                                           | <2e-16  | 10.46%                |
| Chilling                   | 0.11(0.05)                                              | 0.059   | 13.77%                |
| scPDSI                     | -0.56(0.30)                                             | 0.059   | 9.61%                 |
| Random effects             |                                                         |         | 44.59%                |
| SD(site)                   | 12.4                                                    |         |                       |
| SD(species)                | 11.9                                                    |         |                       |
| SD(residual)               | 5.5                                                     |         |                       |
| Model fit                  |                                                         |         |                       |
| Marginal R <sup>2</sup>    | 0.51                                                    |         |                       |
| Conditional R <sup>2</sup> | 0.96                                                    |         |                       |
| AIC                        | 1284                                                    |         |                       |
| BIC                        | 1310                                                    |         |                       |

**Table S6:** Statistics of Model 2 at different chilling thresholds. MAT: mean annual temperature.

|                        |       |         |                                 |        |        |             |
|------------------------|-------|---------|---------------------------------|--------|--------|-------------|
| Variables              | MAT   | Forcing | Chilling (0 °C to 5 °C)         | scPDSI | Random | Unexplained |
| Variance explained (%) | 52.3  | 22.09   | 5.63                            | 0.00   | 13.12  | 6.87        |
| Variables              | MAT   | Forcing | <b>Chilling (-5 °C to 5 °C)</b> |        | Random | Unexplained |
| Variance explained (%) | 52.85 | 22.92   | <b>8.47</b>                     | 0.17   | 10.07  | 5.51        |
| Variables              | MAT   | Forcing | Chilling (-5 °C to 0 °C)        |        | Random | Unexplained |
| Variance explained (%) | 52.09 | 22.68   | 6.11                            | 0.0    | 12.90  | 6.23        |
| Variables              | MAT   | Forcing | Chilling (-10 °C to 0 °C)       |        | Random | Unexplained |
| Variance explained (%) | 52.04 | 22.13   | 5.33                            | 0.00   | 14.95  | 5.54        |

Dataset S1: Data that support the findings of this study are available in Data.csv.

## References

1. H. Hänninen, Modeling bud dormancy release in trees from cool and temperate regions. *Acta Forestalia Fennica* 213. The Society of Forestry in Finland, The Finnish Forest Research Institute, Helsinki (1990).
2. H. Hänninen *et al.*, Experiments are necessary in process-based tree phenology modelling. *Trends Plant Sci.* **24(3)**, 199–209 (2019).
3. Y.H. Fu *et al.*, Declining global warming effects on the phenology of spring leaf unfolding. *Nature* **526**, 104–107 (2015).
4. J.G. Huang, *et al.*, Intra-annual wood formation of subtropical Chinese red pine shows better growth in dry season than wet season. *Tree Physiol.* **38**, 1225–1236 (2018).
5. X. Li, E. Liang, J. Gricar, P. Prislan, S. Rossi, K. Cufar, Age-dependence of xylogenesis and its climatic sensitivity in Smith fir on the south-eastern Tibetan Plateau. *Tree Physiol.* **33**, 48–56 (2013).
6. S.K. Zhang *et al.*, Intra-annual dynamics of xylem growth in *Pinus massoniana* under an experimental N addition in central China. *Tree Physiol.* **37**, 1546–1553 (2017).
7. A. Güney, D. Kerr, A. Sökücü, R. Zimmermann, M. Küppers, Cambial activity and xylogenesis in stems of *Cedrus libani* A. Rich at different altitudes. *Bot. stud.* **56(1)**, 20 (2015).
8. E. Ziacco, C. Truettner, F. Biondi, S. Bullock, Moisture-driven xylogenesis in *Pinus ponderosa* from a Mojave Desert mountain reveals high phenological plasticity. *Plant, Cell Environ.* **41 (4)**, 823–836 (2018).
9. Q. Zeng, S. Rossi, B. Yang, Effects of age and size on xylem phenology in two conifers of Northwestern China. *Front. Plant. Sci.* **8**, 2264 (2017).
10. S. Rossi, *et al.*, Pattern of xylem formation in conifers of cold ecosystems at the Northern Hemisphere. *Global Change Biol.* **22**, 3804–3813 (2016).
11. H.E. Cuny *et al.*, Wood biomass production lags stem-girth increase by over one month in coniferous forests. *Nature Plants* **15160**, (2015).
12. S. Antonucci, S. Rossi, F. Lombardi, M. Marchetti, R. Tognetti, Influence of climatic factors on silver fir xylogenesis along the Italian peninsula. *IAWA* **40**, 259–275 (2019).
13. E. Ziacco, F. Biondi, Tree growth, cambial phenology, and wood anatomy of limber pine at a Great Basin (USA) mountain observatory. *Trees* **30(5)**, 1507–1521 (2016).
14. E. Ziacco, F. Biondi, S. Rossi, A. Deslauriers, Environmental drivers of cambial phenology in Great Basin bristlecone pine. *Tree Physiol.* **36(7)**, 818–831 (2016).
15. A. Deslauriers, S. Rossi, T. Anfodillo, A. Saracino, Cambium phenology, wood formation and temperature thresholds in two contrasting years at high altitude in Southern Italy. *Tree Physiol.* **28**, 863–871 (2008).
16. J. Vieira *et al.*, Adjustment capacity of maritime pine cambial activity in drought-prone environments. *PLOS ONE* **10(5)**, e0126223 (2015).



17. J.J. Camarero, G. Guada, R. Sánchez-Salguero, E. Cervantes, Winter drought impairs xylem phenology, anatomy and growth in Mediterranean Scots pine forests. *Tree Physiol.* **36**, 1536–1549 (2016).
18. J.J. Camarero, J.M. Olano, A. Parras, Plastic bimodal xylogenesis in conifers from continental Mediterranean climates. *New Phytol.* **185**, 471–480 (2010).
19. S. Rossi *et al.*, Conifers in cold environments synchronize maximum growth rate of tree-ring formation with day length. *New Phytol.* **170**, 301–310 (2006).
20. C. Coccozza *et al.*, Monitoring intra-annual dynamics of wood formation with microcores and dendrometers in *Picea abies* at two different altitudes. *Tree Physiol.* **36**, 832–846 (2016).
21. J. Gričar, P. Prislan, V. Gryc, H. Vavřík, M. de Luis, Plastic and locally adapted phenology in cambial seasonality and production of xylem and phloem cells in *Picea abies* from temperate environments. *Tree Physiol.* **34**, 869–881 (2014).
22. H.E. Cuny *et al.*, Couplings in cell differentiation kinetics mitigate air temperature influence on conifer wood anatomy. *Plant, Cell Environ.* **42**, 1222–1232 (2019).
23. T. Anfodillo *et al.*, Widening of xylem conduits in a conifer tree depends on the longer time of cell expansion downwards along the stem. *J. Exp. Bot.* **63**, 837–845 (2012).
24. S. Rossi, A. Deslauriers, T. Anfodillo, V. Carraro, Evidence of threshold temperatures for xylogenesis in conifers at high altitude. *Oecologia* **152**, 1–12 (2007).
25. S. Rossi, A. Deslauriers, T. Anfodillo, M. Carrer, Age-dependent xylogenesis in timberline conifers. *New Phytol.* **177**, 199–208 (2008).
26. A. Gruber, G. Wieser, W. Oberhuber, Intra-annual dynamics of stem CO<sub>2</sub> efflux in relation to cambial activity and xylem development in *Pinus cembra*. *Tree Physiol.* **29**, 641–649 (2009).
27. I. Swidrak, A. Gruber, W. Oberhuber, Xylem and phloem phenology in co-occurring conifers exposed to drought. *Trees* **28**, 1161–1171 (2014).
28. A. Lemay, C. Krause, S. Rossi, A. Achim, Xylogenesis in stems and roots after thinning in the boreal forest of Quebec, Canada. *Tree Physiol.* **37**, 1554–1563 (2017).
29. S. Rossi, H. Morin, A. Deslauriers, P.Y. Plourde, Predicting xylem phenology in black spruce under climate warming. *Global Change Biol.* **17**, 614–625 (2011).
30. H.E. Cuny, C.B. Rathgeber, D. Frank, P. Fonti, M. Fournier, Kinetics of tracheid development explain conifer tree-ring structure. *New Phytol.* **203**, 1231–41 (2014).
31. C.B.K. Rathgeber, S. Rossi, J.D. Bontemps, Cambial activity related to tree size in a mature silver-fir plantation. *Ann. Bot.* **108**, 429–438 (2011).
32. C.B.K. Rathgeber, F. Longuetaud, F. Mothe, H. Cuny, G.L. Moguéc, Phenology of wood formation: Data processing, analysis and visualisation using R (package CAVIAR). *Dendrochronologia* **29**, 139–149 (2011).
33. M. Fajstavr, K. Giagli, H. Vavřík, V. Gryc, J. Urban, The effect of stem girdling

- on xylem and phloem formation in Scots pine. *Silva Fennica* vol. **51** no. 4 article id 1760. 22p. (2017).
34. A. Deslauriers, H. Morin, Y. Begin, Cellular phenology of annual ring formation of *Abies balsamea* in the Quebec boreal forest (Canada). *Can. J. For. Res.* **33(2)**, 190–200 (2003).
  35. V. Treml, J. Kašpar, H. Kuželová, V. Gryc, Differences in intra-annual wood formation in *Picea abies* across the treeline ecotone, Giant Mountains, Czech Republic. *Trees* **29**, 515–526 (2015).
  36. V. Treml, T. Hejda, J. Kašpar, Differences in growth between shrubs and trees: How does the stature of woody plants influence their ability to thrive in cold regions? *Agric. For. Meteorol.* **271**, 54–63 (2019).
  37. S. Rossi, M.J. Girard, H. Morin, Lengthening of the duration of xylogenesis engenders disproportionate increases in xylem production. *Global Change Biol.* **20**, 2261–2271 (2014).
  38. H. Mäkinen, T. Jyske, P. Nöjd, Dynamics of diameter and height increment of Norway spruce and Scots pine in southern Finland. *Ann. For. Sci.* **75(1)**, 28. (2018).
  39. T. Jyske, H. Mäkinen, T. Kalliokoski, P. Nöjd, Intra-annual xylem formation of Norway spruce and Scots pine across latitudinal gradient in Finland. *Agric. For. Meteorol.* **194**, 241–254 (2014).
